# Supplementary material
Source: MDPI journal article supplement (https://www.mdpi.com/2504-3129/2/2/17)
Supplement: s1 [file s1]

Supplementary Material

# Tea Bags - Standard Materials for Testing Impacts of Nitrogen Addition on Litter Decomposition in Aquatic Ecosystems?

Taiki Mori <sup>1,\*</sup>

Kyushu Research Center, Forestry and Forest Products Research Institute, FFPRI, Kurokami 4-11-16, Kumamoto, 860-0862, Japan

\* Correspondence: taikimori7@gmail.com

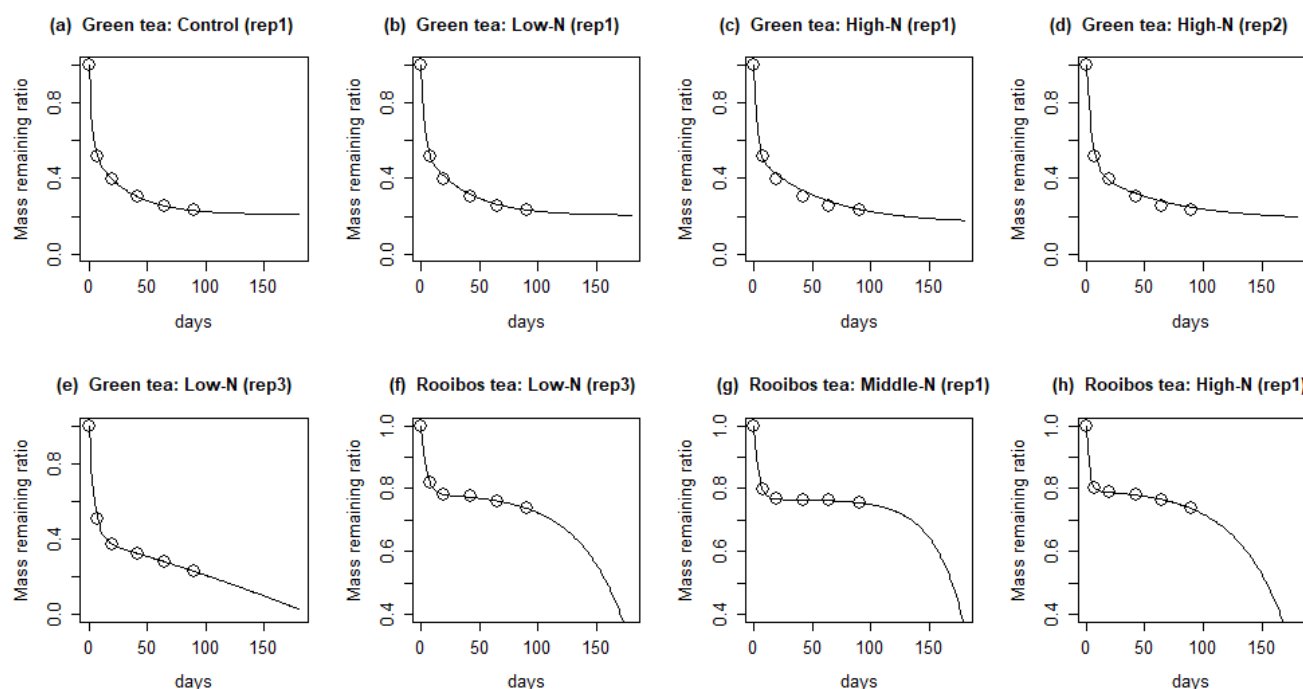

**Figure S1.** Examples of fitting the asymptote model with double exponential term (Eq. 4 in the text) to time-series mass loss data of green teas (a-e) and rooibos teas (f-h). Each figure shows the model fitting to tea bag decomposition data obtained from a replicate. Code numbers of replicates are shown on each figure. Each open circle represents one datum. Parameters of each model are: (a)  $a$ ,  $k1$ ,  $b$ , and  $k2$  is 0.44297764, 0.35642208, 0.34723017, and 0.03150591, respectively; (b)  $a$ ,  $k1$ ,  $b$ , and  $k2$  is 0.44084665, 0.37914748, 0.35471396, and 0.02767483, respectively; (c)  $a$ ,  $k1$ ,  $b$ , and  $k2$  is 0.4708187, 0.3853025, 0.3652233, and 0.0178373, respectively; (d)  $a$ ,  $k1$ ,  $b$ , and  $k2$  is 0.54725426, 0.21713970, 0.27081724, and 0.015745, respectively; (e)  $a$ ,  $k1$ ,  $b$ , and  $k2$  is 0.600997887, 0.214203268, -0.950120034, and -0.001831729, respectively; (f)  $a$ ,  $k1$ ,  $b$ , and  $k2$  is 0.217451477, 0.239464489, -0.005224775, and -0.025222519, respectively; (g)  $a$ ,  $k1$ ,  $b$ , and  $k2$  is 0.2341728320, 0.2652264051, -0.0002957249, and -0.0400969399, respectively; (h)  $a$ ,  $k1$ ,  $b$ , and  $k2$  is 0.207273251, 0.406834784, -0.007380097, and -0.024016403, respectively.
